# Supplementary material for: AKT1 Transcriptomic Landscape in Breast Cancer Cells
Source: MDPI journal article supplement (doi:10.3390/cells11152290), 2022-07-25
Supplement: s1 [file s1]

## **Supplementary File S1**

### **AKT1 Transcriptomic Landscape in Breast Cancer Cells**

Bijesh George, Bin Gui, Rajeswari Raghuraman, Aswathy Mary Paul, Harikrishna Nakshatri,  
Madhavan Radhakrishna Pillai, and Rakesh Kumar

| Sl. No | Sample Name           | Treatment                    | Correlation |
|--------|-----------------------|------------------------------|-------------|
| 1      | Inhibitor VIII R1     | siNON + Inhibitor VIII       | 0.95863     |
| 2      | Inhibitor VIII R2     | siNON + Inhibitor VIII       |             |
| 3      | AKT1 R1               | siAKT1                       | 0.87775     |
| 4      | AKT1 R2               | siAKT1                       |             |
| 7      | Control R1            | siNON                        | 0.96161     |
| 8      | Control R2            | siNON                        |             |
| 9      | AKT1 EGF R1           | siAKT1 + EGF                 | 0.98277     |
| 10     | AKT1 EGF R2           | siAKT1 + EGF                 |             |
| 13     | Control EGF R1        | siNON + EGF                  | 0.98385     |
| 14     | Control EGF R2        | siNON + EGF                  |             |
| 15     | InhibitorVIII EGF R1  | siNON + Inhibitor VIII + EGF | 0.98095     |
| 16     | Inhibitor VIII EGF R2 | siNON + Inhibitor VIII + EGF |             |

**Supplementary Table S1:** The Pearson correlation coefficient between the replicates.

| <b>Condition</b>      | <b>QC passed reads</b> | <b>GC</b> | <b>raw reads mapped</b> | <b>pairs mapped</b> | <b>proper pairs</b> | <b>singletons</b> |
|-----------------------|------------------------|-----------|-------------------------|---------------------|---------------------|-------------------|
| Control R1            | 780,13,338             | 50%       | 792,26,114              | 94.30%              | 88%                 | 5.70%             |
| Control EGF R1        | 764,95,166             | 49%       | 781,63,657              | 94.80%              | 91%                 | 5.20%             |
| Inhibitor VIII EGF R1 | 746,83,608             | 51%       | 756,40,477              | 93.70%              | 88.20%              | 6.30%             |
| InhibitorVIII R1      | 764,89,640             | 51%       | 772,70,933              | 94.10%              | 90.90%              | 5.90%             |
| siAKT1 R1             | 766,53,294             | 51%       | 772,99,453              | 93.60%              | 89.50%              | 6.40%             |
| siAKT1 EGF R1         | 658,95,066             | 51%       | 673,02,992              | 94.70%              | 88.50%              | 5.30%             |
| Control R2            | 646,80,720             | 48%       | 655,57,296              | 94.80%              | 86.10%              | 5.20%             |
| Control EGF R2        | 681,97,242             | 49%       | 694,53,312              | 93.90%              | 83.40%              | 6.10%             |
| Inhibitor VIII EGF R2 | 760,89,630             | 49%       | 762,57,421              | 93.50%              | 84.60%              | 6.50%             |
| InhibitorVIII R2      | 1146,18,348            | 49%       | 1169,39,293             | 94.90%              | 84.50%              | 5.10%             |
| AKT1 R2               | 849,63,954             | 48%       | 864,92,961              | 94.70%              | 86.40%              | 5.30%             |
| AKT1 EGF R2           | 746,82,246             | 50%       | 753,64,429              | 93.70%              | 86.20%              | 6.30%             |

**Supplementary Table S2:** Details of the reads mapped to the genes for each sample.

| Sample                 | Gene counts                         |                  |
|------------------------|-------------------------------------|------------------|
|                        | Genes with at least 10 Reads mapped | Total gene count |
| Control R1             | 15739                               | 22569            |
| Control + EGF R1       | 15872                               | 22422            |
| Inhibitor VIII+ EGF R1 | 15616                               | 22302            |
| InhibitorVIII R1       | 15691                               | 21851            |
| siAKT1 R1              | 15343                               | 21455            |
| siAKT1+ EGF R1         | 15259                               | 21970            |
| Control R2             | 15869                               | 24880            |
| Control+ EGF R2        | 15868                               | 23324            |
| Inhibitor VIII+ EGF R2 | 16237                               | 24110            |
| InhibitorVIII R2       | 17516                               | 26589            |
| siAKT1 R2              | 16827                               | 25001            |
| siAKT1+ EGF R2         | 15874                               | 22882            |

**Supplementary Table S3:** The number of genes identified from different experimental conditions.

| <b>Gene</b> | <b>Abundant Transcript</b> | <b>Chr</b> | <b>Start</b> | <b>End</b> | <b>Number of Transcripts</b> |
|-------------|----------------------------|------------|--------------|------------|------------------------------|
| TFF1        | ENST00000291527            | chr21      | 43782391     | 43786703   | 1                            |
| EEF2        | ENST00000309311            | chr19      | 3976054      | 3985467    | 7                            |
| SCD         | ENST00000370355            | chr10      | 1.02E+08     | 102124591  | 1                            |
| SPTSSB      | ENST00000359175            | chr3       | 1.61E+08     | 161090668  | 3                            |
| KRT81       | ENST00000327741            | chr12      | 52679697     | 52685318   | 1                            |
| LAPTM4A     | ENST00000175091            | chr2       | 20232411     | 20251789   | 2                            |
| NUCKS1      | ENST00000367142            | chr1       | 2.06E+08     | 205719404  | 2                            |
| LAPTM4B     | ENST00000445593            | chr8       | 98787285     | 98865241   | 3                            |
| PERP        | ENST00000421351            | chr6       | 1.38E+08     | 138428648  | 1                            |
| KRT19       | ENST00000361566            | chr17      | 39679869     | 39684560   | 7                            |

**Supplementary Table S4:** The number highly abundant 10 transcripts across experimental conditions.

|                        | <b>siAKT1<br/>(20)</b> | <b>Inhibitor<br/>VIII(22)</b> | <b>siAKT1 EGF<br/>(1550)</b> | <b>Inhibitor<br/>EGF (71)</b> |
|------------------------|------------------------|-------------------------------|------------------------------|-------------------------------|
| Protein_coding         | 13                     | 8                             | 1432                         | 61                            |
| LincRNA                | 3                      | 5                             | 40                           | 1                             |
| Antisense              | 2                      | 3                             | 39                           | 4                             |
| Sense_overlapping      |                        |                               | 6                            |                               |
| Sense_intronic         |                        |                               | 5                            | 1                             |
| Pseudogene             | 2                      | 2                             | 17                           | 2                             |
| Processed_transcript   |                        | 3                             | 9                            | 1                             |
| misc_RNA               |                        |                               | 1                            |                               |
| Polymorphic_pseudogene |                        |                               | 1                            |                               |
| snoRNA                 |                        | 1                             | 1                            |                               |
| TR_V_gene              |                        |                               |                              | 1                             |

**Supplementary Table S5:** The number of potential differentially expressed genes according to their coding potential.

| <b>Transcripts</b>                                           | <b>siAKT1</b> | <b>Inhibitor VIII</b> | <b>Gene Symbol</b>                  | <b>Functional Involvement</b>                                                    | <b>Ref.</b> |
|--------------------------------------------------------------|---------------|-----------------------|-------------------------------------|----------------------------------------------------------------------------------|-------------|
| ENSG00000004059+<br>ENSG00000106328:E002                     | -19.12        | 0.02                  | ARF5,<br>FSCN3                      | FSCN3 involved in cancer metastasis                                              | [68]        |
| ENSG00000244274+<br>ENSG00000204070+<br>ENSG00000254806:E034 | -18.79        | -0.16                 | DBNDD2,<br>SYS1,<br>SYS1-<br>DBNDD2 | DBNDD2 upregulated in BRCA1 mutated Breast cancer, SYS1 mutation found in cancer | [63,86]     |
| ENSG00000244274+<br>ENSG00000204070+<br>ENSG00000254806:E033 | -18.72        | -0.13                 |                                     |                                                                                  |             |
| ENSG00000067836:E047                                         | -17.94        | -0.33                 | ROGDI                               | Found as target in Cervical cancer                                               | [70]        |
| ENSG00000067836:E043                                         | -17.88        | 0.18                  |                                     |                                                                                  |             |
| ENSG00000067836:E046                                         | -17.73        | -0.07                 |                                     |                                                                                  |             |
| ENSG00000067836:E045                                         | -17.73        | -0.03                 |                                     |                                                                                  |             |
| ENSG00000067836:E044                                         | -17.73        | 0.04                  |                                     |                                                                                  |             |
| ENSG00000112977:E012                                         | -17.93        | 0.51                  | DAP                                 | Death associated protein inactivation reported in many Breast cancers            | [87]        |
| ENSG00000100605:E027                                         | -17.92        | 0.41                  | ITPK1                               | Over expressed in Breast cancer                                                  | [69]        |

**Supplementary Table S6:** The 10 selected splice variation alterations by each silencing method used in the experiment compared to the control.

| <b>Transcripts</b>                                           | <b>siAKT<br/>1 +<br/>EGF</b> | <b>Inhibitor<br/>VIII +<br/>EGF</b> | <b>Gene<br/>Symbol</b>             | <b>Functional<br/>involvement</b>                                            | <b>Ref.</b> |
|--------------------------------------------------------------|------------------------------|-------------------------------------|------------------------------------|------------------------------------------------------------------------------|-------------|
| ENSG00000075292:E053                                         | -28.16                       | 1.48                                | ZNF638                             | Colorectal cancer                                                            | [88]        |
| ENSG00000123636+<br>ENSG00000225369:E048                     | -26.96                       | 1.92                                | BAZ2B ,<br>NSG000002<br>25369 Gene | No reported cancer<br>relationship                                           |             |
| ENSG00000116001+<br>ENSG00000115998:E061                     | -22.43                       | 1.24                                | TIA1,<br>C2orf42                   | TIA1 found decreased<br>in human cancer                                      | [71]        |
| ENSG00000156011+<br>ENSG00000244018:E018                     | -19.09                       | -1.44                               | PSD3 ,<br>RPL35P6                  | PSD3 found<br>downregulated in<br>Breast cancer                              | [72]        |
| ENSG00000155903:E036                                         | -17.09                       | -1.15                               | RASA2                              | Mutation is high risk<br>in Breast cancer                                    | [89]        |
| ENSG00000104835+<br>ENSG00000269190+<br>ENSG00000269547:E057 | -16.69                       | -0.81                               | SARS2,<br>FBXO17                   | FBXO17 promotes<br>cancer in<br>adenocarcinoma                               | [90]        |
| ENSG00000145390:E030                                         | -16.87                       | 0.19                                | USP53                              | Decreased USP53<br>levels are a reliable<br>marker of lung<br>adenocarcinoma | [92]        |
| ENSG00000188739+<br>ENSG00000054267:E064                     | -17.58                       | -0.67                               | RBM34,<br>ARID4B                   | ARID4B is a potential<br>preoression modifier<br>gene                        | [93]        |
| ENSG00000188739+<br>ENSG00000054267:E066                     | -17.04                       | -1.00                               |                                    |                                                                              |             |
| ENSG00000120370:E004                                         | 1.28                         | 14.94                               | GORAB                              | Reported co amplified<br>in cancer                                           | [77]        |

**Supplementary Table S7:** The select splice variations identified in different experimental conditions.



A.

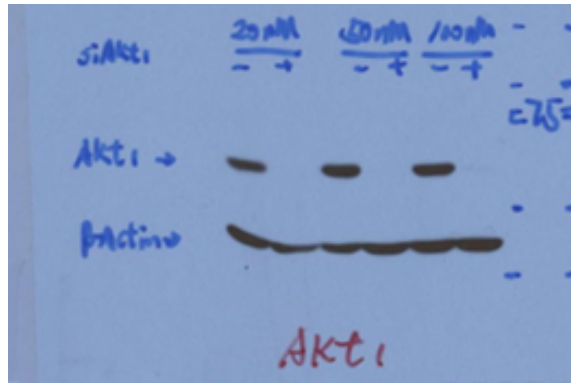

siAKT1

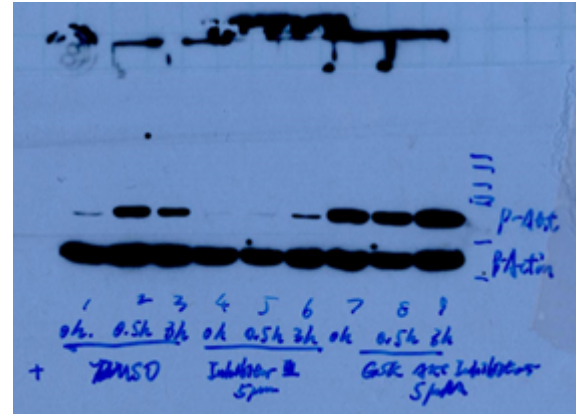

Inhibitor VIII, lanes 4-6

B.

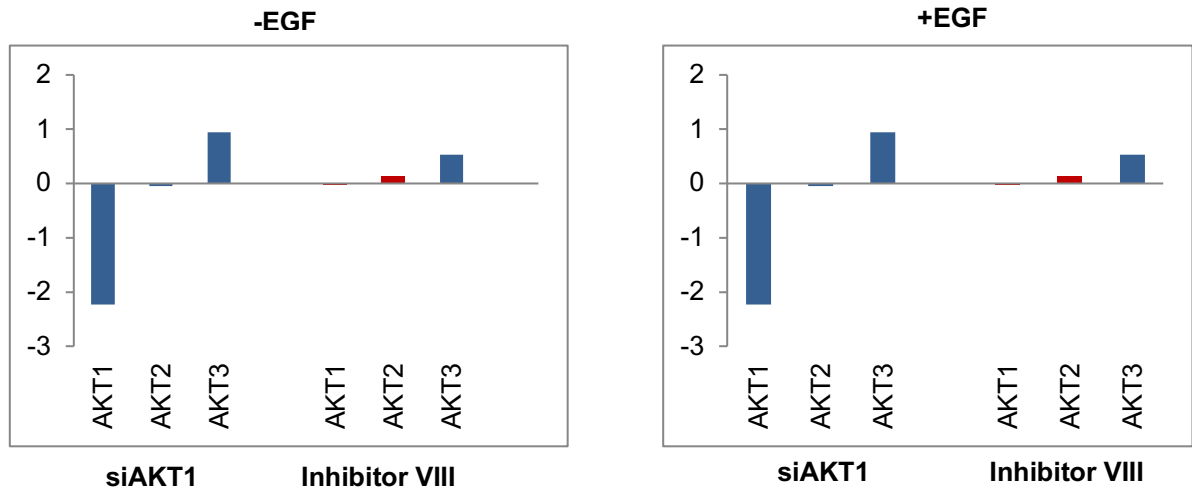

**Figure S1:** Expression levels of AKTs. (A) Levels of AKT1 and Actin in MCF-7 cells after silencing siAKT1 using for different concentrations for 36 hr (left panel) or using AKT Inhibitor VIII (right panel, lanes 4-6) or an unrelated control inhibitor (right panel, lanes 7-9). Western blotting was performed by AKT1 and Actin antibodies. (B) The levels of AKT1 expression after silencing is shown using the processed datasets from RNA-Sequencing experiments.

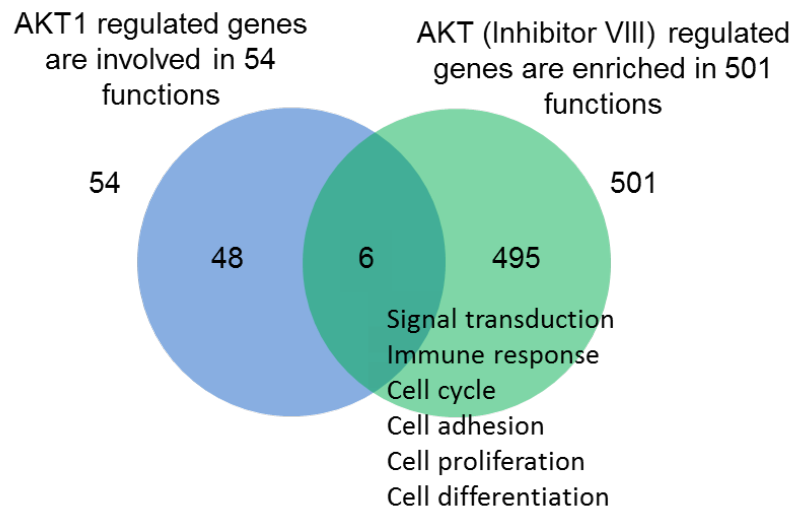

**Figure S2:** Comparative analysis of functions regulated by AKT1 regulated genes versus the functions inhibited by pan- AKT inhibitor VIII, showing six predicted shared functions.

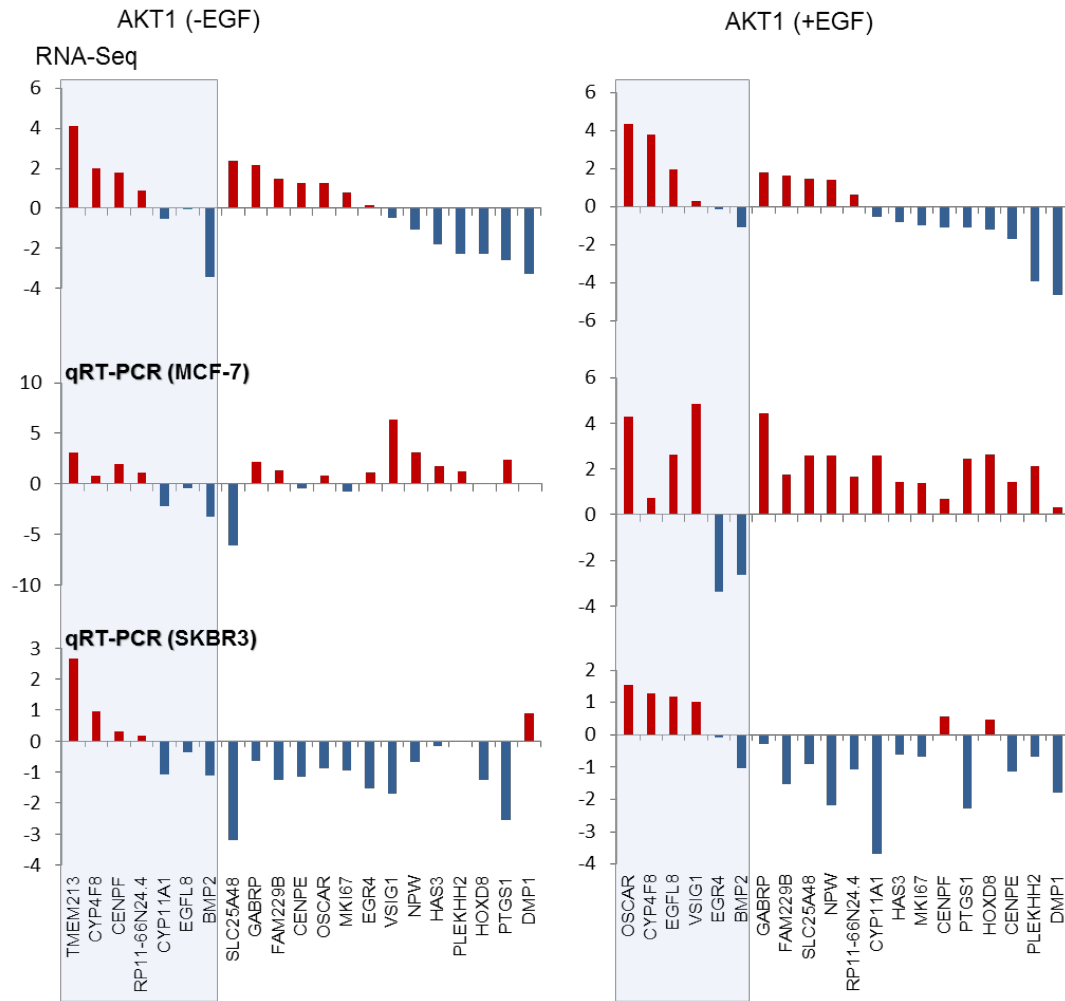

**Figure S3:** Status of the fold-change values from the RNA-Sequencing and RT-PCR assays for selected genes using MCF-7 and SKBR3 cell lines. Genes follow similar pattern of expression were connected with the box and the upregulated genes are indicated with red and down regulated genes are indicated with blue.

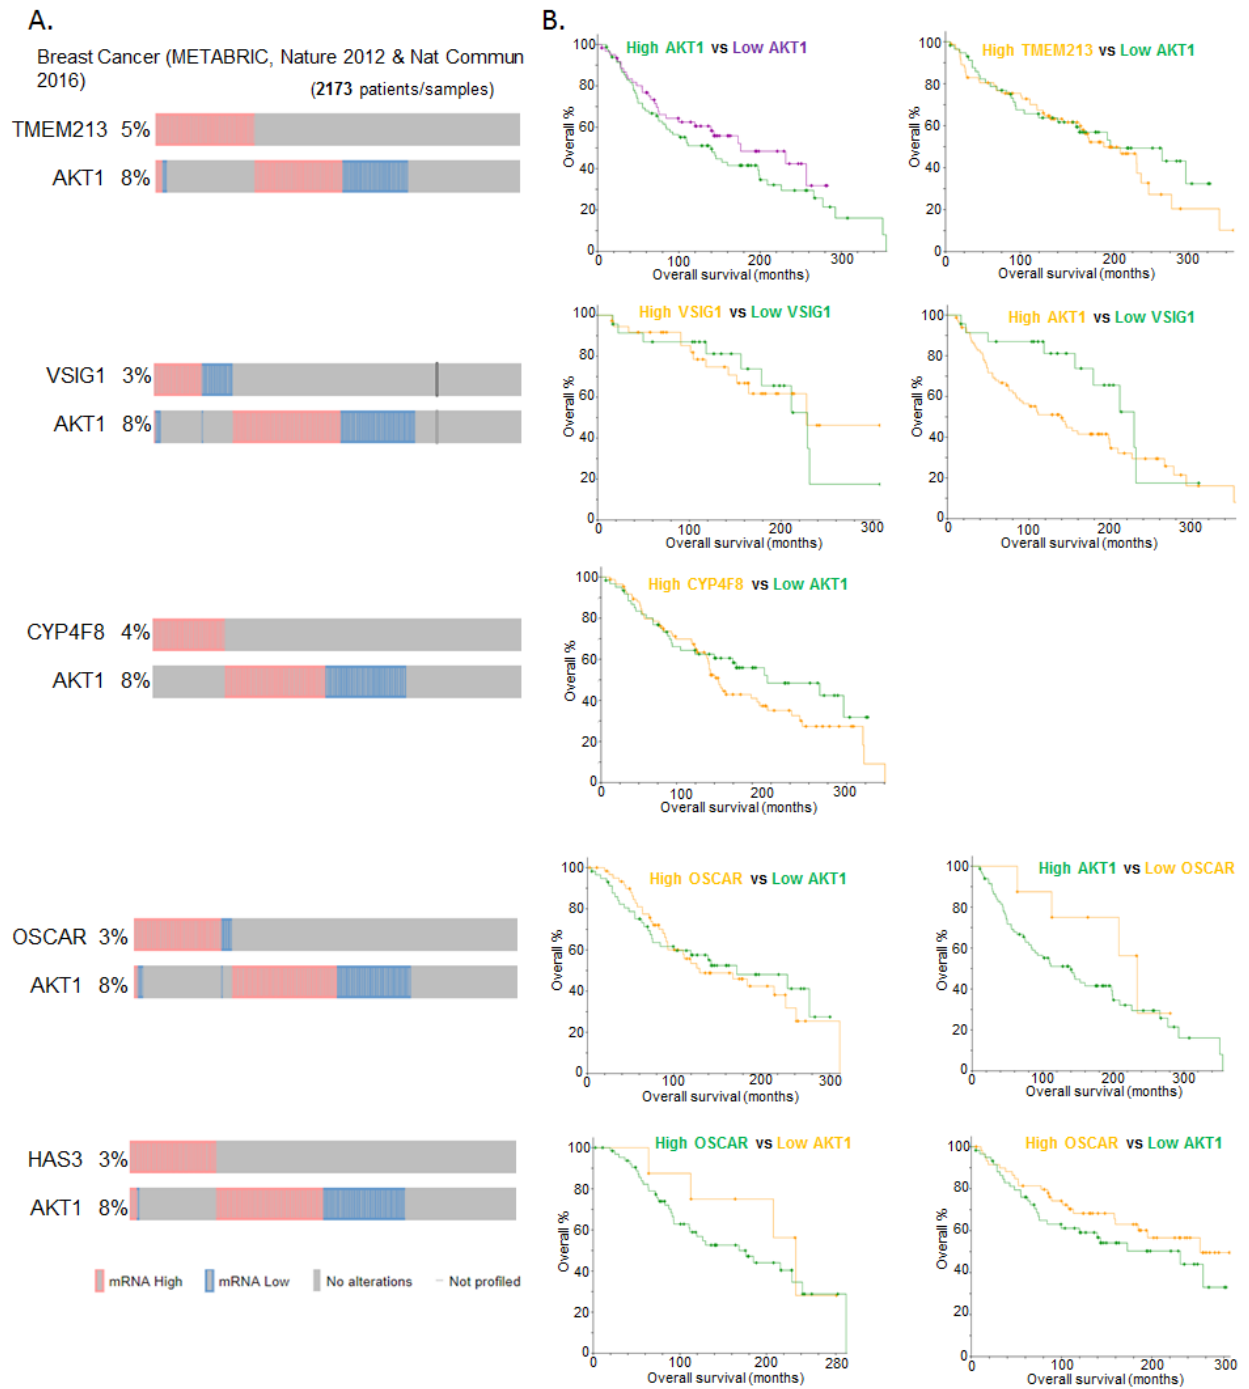

**Figure S4:** The expression levels (A) of selected genes in breast cancer dataset along with the changes in the patient survival (B).

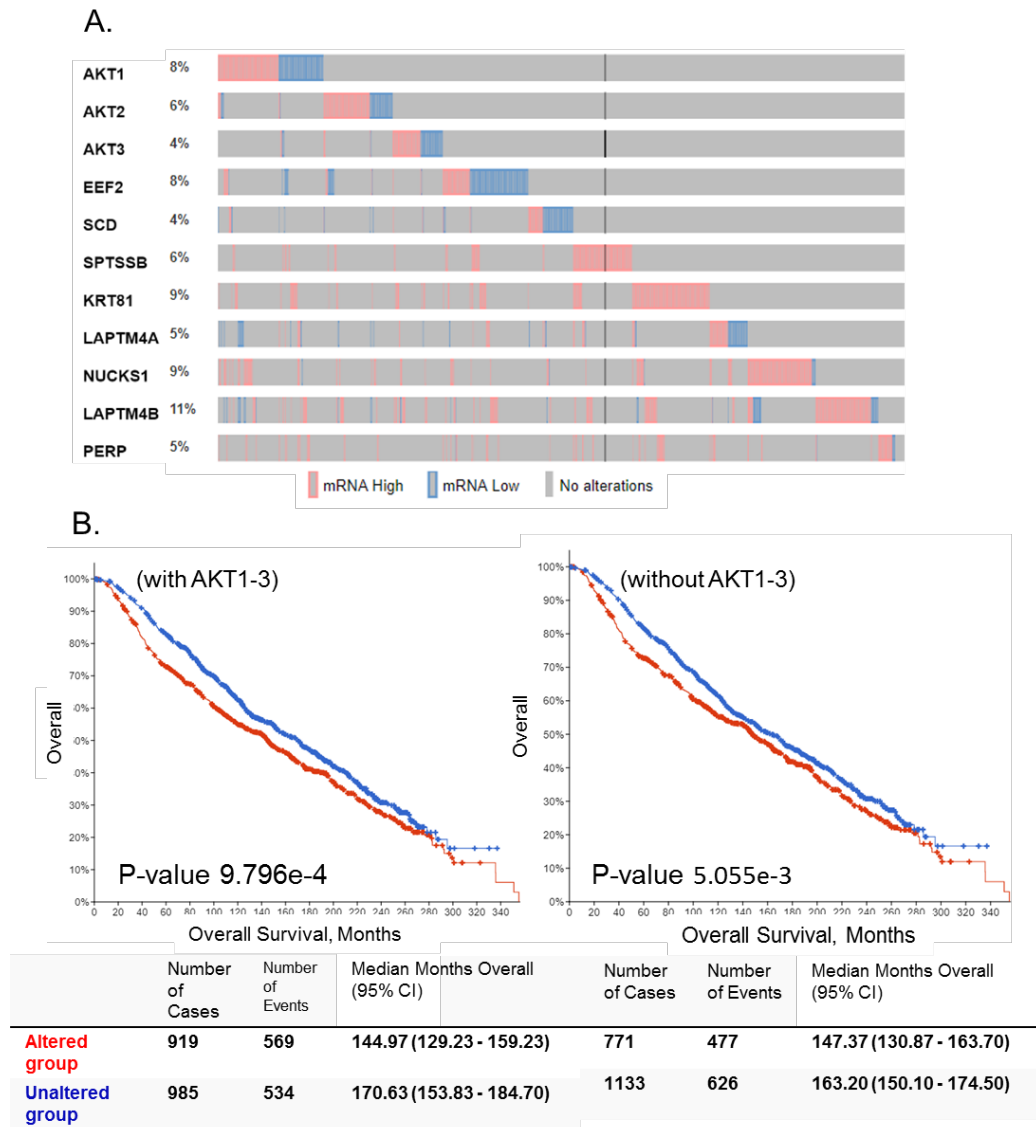

**Figure S5:** Gene expression and survival analysis of select highly abundant genes. **(A)** The levels of expression of AKT1-3 isoforms and highly abundant genes in Breast Cancer (METABRIC, Nature 2012 & Nat Commun 2016) data [49-51] from CBioPortal [52, 53]. **(B)** Overall patient survival status based on the alterations for highly abundant genes and also along with AKT isoforms.
